## CLINICAL REMINDER

# Giant cell arteritis: a pain in the neck

VANESSA TOBERT<sup>1</sup>, LAUREN RICHARDSON<sup>1</sup>, KEVIN M. BRADLEY<sup>2</sup>, APURBA CHATTERJEE<sup>3</sup>

<sup>1</sup>Oxford University Hospitals NHS Foundation Trust, Oxford, England

<sup>2</sup>PETIC, Cardiff University, Cardiff, Wales

<sup>3</sup>Royal Berkshire NHS Foundation Trust, Reading, England

Address correspondence to: Vanessa Tobert, Clinical Coordination Centre, Level 5 – C/D Corridor, John Radcliffe Hospital | Oxford University Hospitals NHS Foundation Trust, Headley Way, Headington, Oxford, OX3 9DZ.  
Tel: 07722206103. Email: vanessa.tobert@nhs.net

Giant cell arteritis (GCA) is an important cause of vasculitis in the older patient. Common manifestations include headache, visual disturbance, tender temporal arteries and jaw claudication secondary to granulomatous inflammation of large- and medium-sized vessels [1].

We report the case of an 86-year-old female presenting with fever, sore throat and raised inflammatory markers. No

infective source was found. Positron emission tomography demonstrated abnormal fluorodeoxyglucose uptake within the carotid, supporting a diagnosis of GCA (Figure 1). Treatment with high-dose steroids led to rapid symptomatic improvement and a dramatic reduction in C-reactive protein.

Early recognition and treatment of GCA prevents irreversible neuro-ophthalmic complications. More than 25% of cases may be missed by relying on the 1990 American College of Rheumatology (ACR) classification criteria alone [2] as isolated upper respiratory tract symptoms are the initial manifestation in 4% of patients [3]. GCA should be considered in older patients with respiratory symptoms and raised inflammatory markers with no infective source.

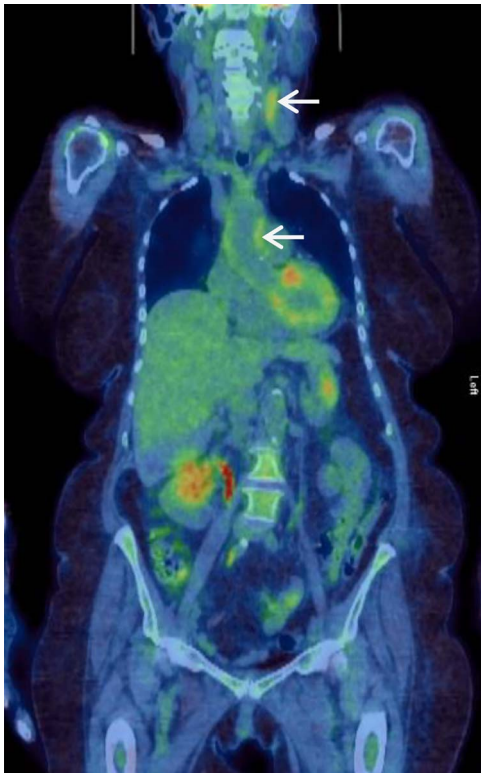

**Figure 1.** Coronal fused positron emission tomography demonstrating increased left carotid (SUVmax 4.6) and ascending aortic fluorodeoxyglucose uptake.

**Declaration of Conflicts of Interest:** None.

**Declaration of Sources of Funding:** None.

**Declaration of Consent:** Written informed consent for publication of their clinical details and clinical images was obtained from the patient.

## References

1. Salvarani C, Cantini F, Boiardi L, Hunder GG. Polymyalgia rheumatica and giant-cell arteritis. *N Engl J Med* 2002; 347: 261–71.
2. Murchison AP, Gilbert ME, Bilyk JR, et al. Validity of the American College of Rheumatology criteria for the diagnosis of giant cell arteritis. *Am J Ophthalmol* 2012; 154: 722–9.
3. Larson TS, Hall S, Hepper NG, Hunder GG. Respiratory tract symptoms as a clue to giant cell arteritis. *Ann Intern Med* 1984; 101: 594–7.

**Received 3 January 2020; editorial decision 15 March 2020**
